# Supplementary material
Source: PubMed Central journal article supplement (PMC1413902)

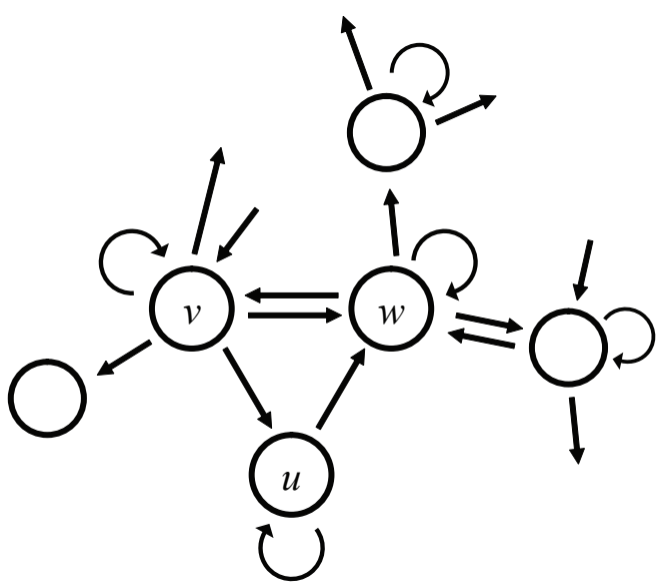

Supplement: pnas_0510932103_2.pdf [file pnas_0510932103_2.pdf]

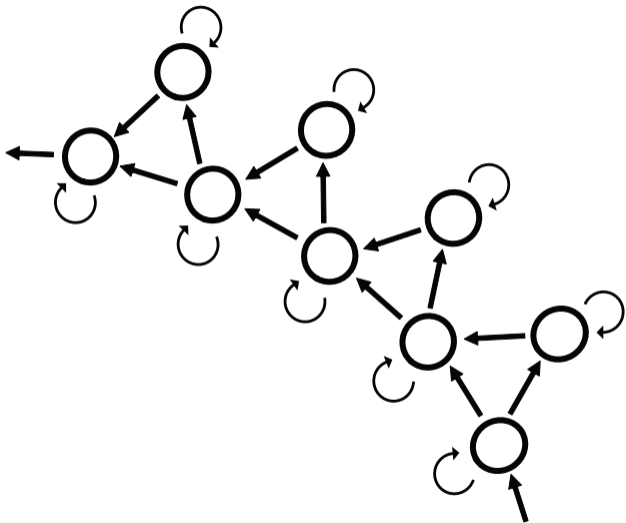

Supplement: pnas_0510932103_3.pdf [file pnas_0510932103_3.pdf]

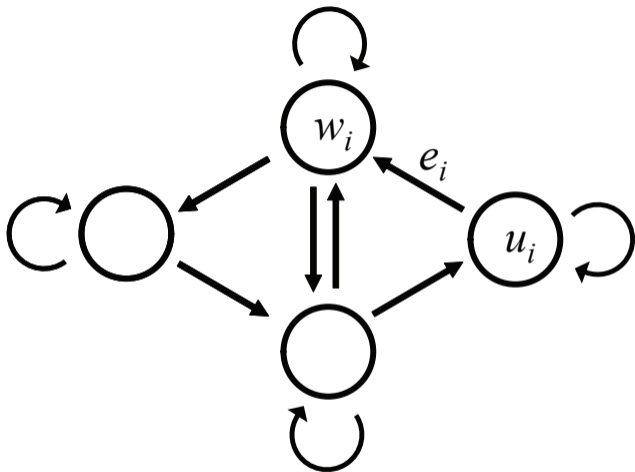

Supplement: pnas_0510932103_4.pdf [file pnas_0510932103_4.pdf]
